# Supplementary material for: A unified study for water adsorption on metals: meaningful models from structural motifs
Source: Royal Society of Chemistry journal article supplement (doi:10.1039/c4cp02508c), 2014-01-01
Supplement: c4cp02508c1.pdf [file c4cp02508c1.pdf]

**Supporting Information to:**

**A unified study for water adsorption on metals:  
meaningful models from structural motifs**

Guillem Revilla-López, Núria López\*

*Institute of Chemical Research of Catalonia, ICIQ, Av. Països Catalans 16, 43007  
Tarragona, Spain; nlopez@iciq.es*

**Table of Contents**

|                                                                                   |      |
|-----------------------------------------------------------------------------------|------|
| <b>Figure S1.</b> Convergence tests.                                              | SM-2 |
| <b>Table S1.</b> Adsorption energies for isolated molecules and continuous motifs | SM-3 |

**Figure S1.** Convergence tests performed for adsorption energies,  $E_{ads}$  in eV/H<sub>2</sub>O, on Pd(111) surface with increasing k-point densities (left) and kinetic cut-off energies Ice-like, sqrt(37) and Rosette (blue, green and red colors respectively).

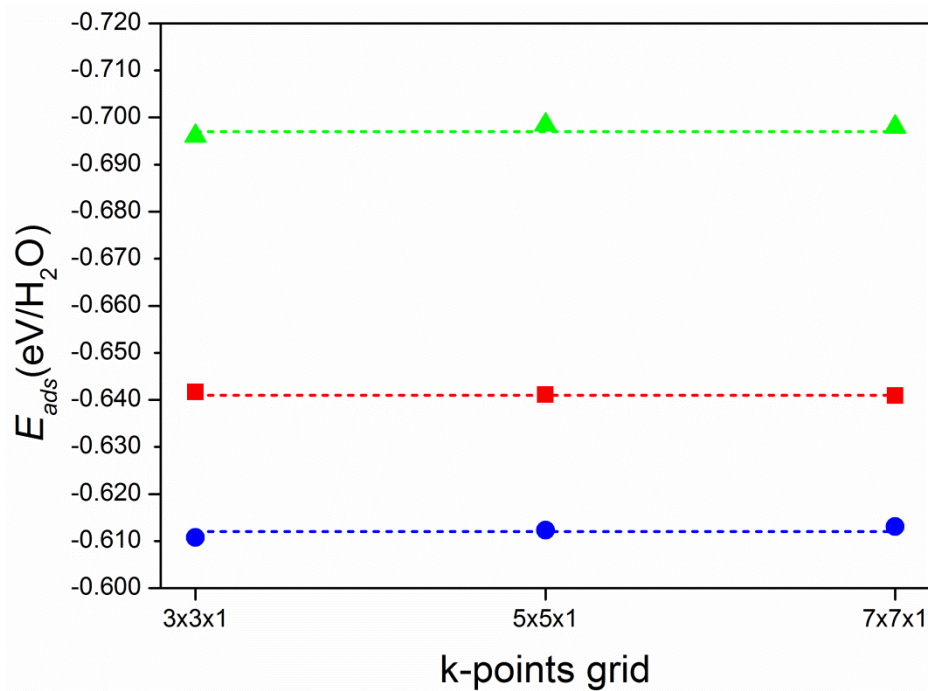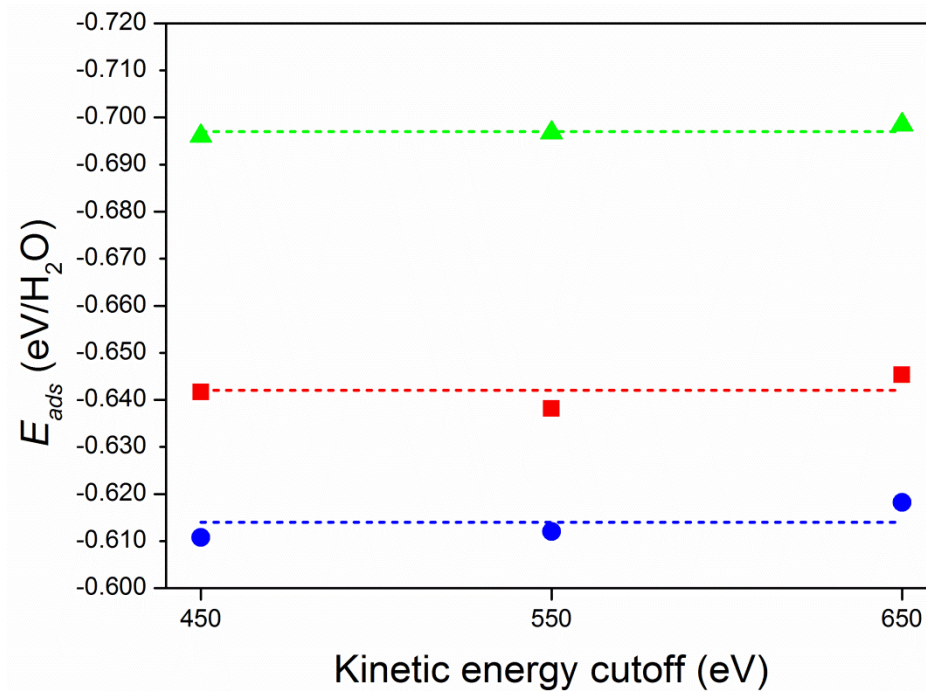

**Table S1.** Isolated water adsorption energy (in eV/H<sub>2</sub>O),  $E_M^w$  for the unstrained (111) facets of metals in this work. Three different configurations are presented: flat,  $E_M^{w,f}$ ; H-down,  $E_M^{w,H}$ , dissociated,  $E_M^{w,d}$ . Energies are in eV/H<sub>2</sub>O.

|                 | $E_M^{w,f}$ | $E_M^{w,H}$ | $E_M^{w,d}$ | $E_M^{w,V}$ |
|-----------------|-------------|-------------|-------------|-------------|
| <b>Pd(111)</b>  | -0.367      | -0.130      | N.A.        | -0.405      |
| <b>Pt(111)</b>  | -0.344      | -0.120      | N.A.        | -0.084      |
| <b>Ru(0001)</b> | -0.490      | -0.144      | -0.836      | N.A.        |
| <b>Ir(111)</b>  | -0.395      | -0.154      | N.A.        | N.A.        |
| <b>Rh(111)</b>  | -0.443      | -0.166      | -0.334      | N.A.        |
| <b>Au(111)</b>  | -0.217      | -0.106      | N.A.        | N.A.        |
| <b>Ag(111)</b>  | -0.268      | -0.114      | N.A.        | N.A.        |
